# Supplementary material
Source: publisher figshare collection journal article supplement (https://gsajournals.figshare.com/ndownloader/files/29157477)
Supplement: Supplementary file 1 [file 29157477]

Table S7. Coordinates of ampliconic sex-linked gene copies on the mm10 reference genome.
Type	Gene	Ensembl identifier	GeneName	Compare	chr	start	stop	strand	size	Target %id	Query %id	Notes
Paralogues	Slx	ENSMUSG00000084063	Gm5934	Region ComparisonAlignment (protein)Alignment (cDNA)	X	24474308	24500760	-1	26452	95.75%	95.75%	blat seed
Paralogues	Slx	ENSMUSG00000081218	Gm4297	Region ComparisonAlignment (protein)Alignment (cDNA)	X	24552250	24574895	-1	22645	94.79%	94.34%	blat seed
Paralogues	Slx	ENSMUSG00000093923	Gm5935	Region ComparisonAlignment (protein)Alignment (cDNA)	X	24753162	24775164	-1	22002	97.17%	97.17%
Blat	Slx		Gm14632	Blat	X	24948453	24970286	1	21833	100.00%	100.00%
Paralogues	Slx	ENSMUSG00000096620	Gm5169	Region ComparisonAlignment (protein)Alignment (cDNA)	X	25277483	25301455	-1	23972	96.23%	96.23%	blat seed
Paralogues	Slx	ENSMUSG00000073267	Gm1993	Region ComparisonAlignment (protein)Alignment (cDNA)	X	25548296	25570452	-1	22156	96.70%	96.70%
Paralogues	Slx	ENSMUSG00000079655	Gm5168	Region ComparisonAlignment (protein)Alignment (cDNA)	X	26028214	26051041	-1	22827	96.21%	95.75%	blat seed
Paralogues	Slx	ENSMUSG00000082639	Gm2012	Region ComparisonAlignment (protein)Alignment (cDNA)	X	26200678	26231355	-1	30677	96.70%	96.70%	blat seed
Paralogues	Slx	ENSMUSG00000083628	Gm2030	Region ComparisonAlignment (protein)Alignment (cDNA)	X	26286977	26310044	-1	23067	95.28%	95.28%	blat seed
Paralogues	Slx	ENSMUSG00000096457	Slx	Region ComparisonAlignment (protein)Alignment (cDNA)	X	26522656	26545565	1	22909	100%	100%	blat seed
Paralogues	Slx	ENSMUSG00000071788	Gm14525	Region ComparisonAlignment (protein)Alignment (cDNA)	X	26672777	26702638	-1	29861	97.17%	97.17%	blat seed
Paralogues	Slx	ENSMUSG00000080725	Gm6121	Region ComparisonAlignment (protein)Alignment (cDNA)	X	26912743	26935697	-1	22954	97.17%	97.17%
Blat	Slx		Prediction	Blat	X	27333199	27356435	-1	23236	97.50%	97.50%	GeneScan and Augustus Predicted gene
Paralogues	Slx	ENSMUSG00000095546	Gm10230	Region ComparisonAlignment (protein)Alignment (cDNA)	X	27472031	27494882	-1	22851	97.17%	97.17%
Blat	Slx		Gm10230	Blat	X	27577077	27599952	1	22875	100.00%	100.00%
Blat	Slx		Prediction	Blat	X	27771221	27791587	-1	20366	97.40%	97.40%	GeneScan Predicted gene
Blat	Slx		Prediction	Blat	X	27771331	27792939	-1	21608	97.60%	97.60%	GeneScan Predicted gene
Paralogues	Slx	ENSMUSG00000095293	Gm10058	Region ComparisonAlignment (protein)Alignment (cDNA)	X	27924017	27946885	-1	22868	97.17%	97.17%
Paralogues	Slx	ENSMUSG00000094624	Gm4836	Region ComparisonAlignment (protein)Alignment (cDNA)	X	28270710	28293632	-1	22922	97.17%	97.17%
Blat	Slx		Prediction	Blat	X	28446000	28466805	-1	20805	97.50%	97.50%	GeneScan and Augustus Predicted gene
Paralogues	Slx	ENSMUSG00000096457	Gm10147	Region ComparisonAlignment (protein)Alignment (cDNA)	X	28584992	28607842	-1	22850	97.17%	97.17%	blat seed
Paralogues	Slx	ENSMUSG00000095887	Gm10096	Region ComparisonAlignment (protein)Alignment (cDNA)	X	28931821	28954702	-1	22881	97.17%	97.17%
Paralogues	Slx	ENSMUSG00000073257	Gm10488	Region ComparisonAlignment (protein)Alignment (cDNA)	X	29976314	29999162	1	22848	96.70%	96.70%
Paralogues	Slx	ENSMUSG00000073255	Gm14632	Region ComparisonAlignment (protein)Alignment (cDNA)	X	30329772	30352645	1	22873	97.17%	97.17%
Blat	Slx		Prediction	Blat	X	30680344	30703056	-1	22712	97.70%	97.70%	GeneScan Predicted gene
Paralogues	Slx	ENSMUSG00000094759	Gm10487	Region ComparisonAlignment (protein)Alignment (cDNA)	X	30820542	30843469	-1	22927	97.17%	97.17%
Blat	Slx		Prediction	Blat	X	34873230	34894001	1	20771	97.70%	97.70%	GeneScan and Augustus Predicted gene
Blat	Slx		Prediction	Blat	X	34873586	34895109	1	21523	97.00%	97.00%	GeneScan and Augustus Predicted gene
Paralogues	Slx	ENSMUSG00000073247	Gm10486	Region ComparisonAlignment (protein)Alignment (cDNA)	X	35067384	35090316	1	22932	97.17%	97.17%
Blat	Slx		Prediction	Blat	X	35206111	35228421	1	22310	97.20%	97.20%	GeneScan Predicted gene
Paralogues	Slx	ENSMUSG00000073245	Gm14819	Region ComparisonAlignment (protein)Alignment (cDNA)	X	35404183	35427093	1	22910	97.17%	97.17%
Parent	Slxl1	ENSMUSG00000067909		Slxl1	X	55226876	55243723	1	16847	100%	100%	blat seed
Paralogues	Slxl1	ENSMUSG00000096468	Gm16405	Region ComparisonAlignment (protein)Alignment (cDNA)	X	54531208	54548016	1	16808	99.35%	99.35%
Paralogues	Slxl1	ENSMUSG00000094714	Gm16430	Region ComparisonAlignment (protein)Alignment (cDNA)	X	54622211	54639019	1	16808	99.35%	99.35%
Blat	Slxl1		Prediction	Blat	X	55796696	55817052	1	20356	98.00%	98.00%	Augustus and GeneScan prediction
Blat	Slxl1		Gm14590	Blat	X	55019258	55112454	1	93196	99.80%	99.80%	pseudogene
Blat	Sly		Prediction	Blat	Y	4768843	4792801	-1	23958	98.50%	98.50%	Augustus and Genscan Predictions
Paralogues	Sly	ENSMUSG00000101243	Gm28919	Region ComparisonAlignment (protein)Alignment (cDNA)	Y	6583546	6615511	1	31965	89.58%	96.85%	blat seed
Paralogues	Sly	ENSMUSG00000100939	Gm28998	Region ComparisonAlignment (protein)Alignment (cDNA)	Y	7253787	7280017	1	26230	99.10%	99.10%
Paralogues	Sly	ENSMUSG00000100645	Gm28576	Region ComparisonAlignment (protein)Alignment (cDNA)	Y	7722941	7749195	1	26254	99.10%	99.10%	blat seed
Paralogues	Sly	ENSMUSG00000101928	Gm20824	Region ComparisonAlignment (protein)Alignment (cDNA)	Y	8257907	8284105	1	26198	98.65%	98.65%
Paralogues	Sly	ENSMUSG00000101396	Gm28510	Region ComparisonAlignment (protein)Alignment (cDNA)	Y	10412737	10444691	1	31954	90.00%	97.30%	blat seed
Paralogues	Sly	ENSMUSG00000100231	Gm29554	Region ComparisonAlignment (protein)Alignment (cDNA)	Y	12273932	12306702	1	32770	97.87%	82.88%	blat seed
Blat	Sly		Prediction	Blat	Y	13782071	13810076	-1	28005	97.50%	97.50%	Augustus and Genscan Predictions
Paralogues	Sly	ENSMUSG00000104191	Gm30737	Region ComparisonAlignment (protein)Alignment (cDNA)	Y	14400710	14426798	1	26088	98.20%	98.20%
Blat	Sly		Prediction	Blat	Y	15155240	15187532	1	32292	99.30%	99.30%	Genscan Prediction
Blat	Sly		Prediction	Blat	Y	16985819	17018588	1	32769	100.00%	100.00%	Augustus and Genscan Predictions
Blat	Sly		Prediction	Blat	Y	18494782	18522801	1	28019	97.50%	97.50%	Augustus and Genscan Predictions
Paralogues	Sly	ENSMUSG00000103371	Gm35134	Region ComparisonAlignment (protein)Alignment (cDNA)	Y	19113007	19139093	1	26086	98.20%	98.20%
Blat	Sly		Prediction	Blat	Y	19867853	19900135	1	32282	99.30%	99.30%	Genscan Prediction
Blat	Sly		Prediction	Blat	Y	20697407	20729423	-1	32016	99.60%	99.60%	Genscan Prediction
Blat	Sly		Prediction	Blat	Y	20706326	20729424	1	23098	99.50%	99.50%	Genscan Prediction
Paralogues	Sly	ENSMUSG00000102668	Gm29866	Region ComparisonAlignment (protein)Alignment (cDNA)	Y	20967477	20993657	-1	26180	99.55%	99.55%
Blat	Sly		Prediction	Blat	Y	21487705	21513786	1	26081	99.20%	99.20%	Genscan Prediction
Paralogues	Sly	ENSMUSG00000103528	Gm31571	Region ComparisonAlignment (protein)Alignment (cDNA)	Y	22025164	22051353	-1	26189	99.10%	99.10%
Paralogues	Sly	ENSMUSG00000103919	Gm21366	Region ComparisonAlignment (protein)Alignment (cDNA)	Y	22835086	22861256	-1	26170	100.00%	100.00%
Blat	Sly		Prediction	Blat	Y	23674571	23698806	-1	24235	99.40%	99.40%	Genscan Prediction
Blat	Sly		Gm20857	Blat	Y	24191406	24214673	-1	23267	99.40%	99.40%
Blat	Sly		Gm20857	Blat	Y	24701664	24727815	-1	26151	99.40%	99.40%
Blat	Sly		Gm20857	Blat	Y	25217641	25240911	-1	23270	99.30%	99.30%
Blat	Sly		Gm20857	Blat	Y	25730686	25753945	-1	23259	99.40%	99.40%
Paralogues	Sly	ENSMUSG00000100055	Gm20890	Region ComparisonAlignment (protein)Alignment (cDNA)	Y	26750605	26776799	-1	26194	99.55%	99.55%
Paralogues	Sly	ENSMUSG00000099541	Gm21488	Region ComparisonAlignment (protein)Alignment (cDNA)	Y	27495726	27521920	-1	26194	99.55%	99.55%
Paralogues	Sly	ENSMUSG00000101158	Gm20894	Region ComparisonAlignment (protein)Alignment (cDNA)	Y	28245352	28271512	-1	26160	100.00%	100.00%
Blat	Sly		Gm21679	Blat	Y	29652761	29684810	-1	32049	99.90%	99.90%
Paralogues	Sly	ENSMUSG00000100467	Gm29582	Region ComparisonAlignment (protein)Alignment (cDNA)	Y	30706533	30738561	-1	32028	95.50%	95.50%
Paralogues	Sly	ENSMUSG00000094789	Gm28490	Region ComparisonAlignment (protein)Alignment (cDNA)	Y	31602724	31634756	-1	32032	95.50%	95.50%	blat seed
Paralogues	Sly	ENSMUSG00000095263	Gm21094	Region ComparisonAlignment (protein)Alignment (cDNA)	Y	32588415	32620443	-1	32028	95.95%	95.95%
Paralogues	Sly	ENSMUSG00000095011	Gm20838	Region ComparisonAlignment (protein)Alignment (cDNA)	Y	33511116	33543164	-1	32048	95.95%	95.95%
Paralogues	Sly	ENSMUSG00000095793	Gm20855	Region ComparisonAlignment (protein)Alignment (cDNA)	Y	35105684	35131833	-1	26149	100.00%	100.00%
Paralogues	Sly	ENSMUSG00000096650	Gm20896	Region ComparisonAlignment (protein)Alignment (cDNA)	Y	35895328	35921526	-1	26198	100.00%	100.00%
Blat	Sly		Gm20736	Blat	Y	36410565	36436859	1	26294	99.40%	99.40%
Paralogues	Sly	ENSMUSG00000101933	Gm20835	Region ComparisonAlignment (protein)Alignment (cDNA)	Y	36709098	36735290	-1	26192	100.00%	100.00%
Paralogues	Sly	ENSMUSG00000101157	Gm20905	Region ComparisonAlignment (protein)Alignment (cDNA)	Y	37233420	37259603	-1	26183	100.00%	100.00%
Paralogues	Sly	ENSMUSG00000100892	Gm20897	Region ComparisonAlignment (protein)Alignment (cDNA)	Y	38476061	38502238	-1	26177	100.00%	100.00%
Paralogues	Sly	ENSMUSG00000093895	Gm21865	Region ComparisonAlignment (protein)Alignment (cDNA)	Y	40290790	40316903	-1	26113	98.20%	98.20%
Blat	Sly		Prediction	Blat	Y	40905075	40937012	1	31937	97.60%	97.60%	Augustus and Genscan Predictions
Blat	Sly		Prediction	Blat	Y	41249041	41274638	1	25597	97.40%	97.40%	Augustus and Genscan Predictions
Blat	Sly		Prediction	Blat	Y	41619421	41638568	-1	19147	98.40%	98.40%	Genscan Prediction
Blat	Sly		Prediction	Blat	Y	41622049	41645496	-1	23447	98.70%	98.70%	Genscan Prediction
Paralogues	Sly	ENSMUSG00000101471	Gm29276	Region ComparisonAlignment (protein)Alignment (cDNA)	Y	42550083	42582250	-1	32167	95.95%	95.95%
Blat	Sly		Prediction	Blat	Y	43141094	43173208	-1	32114	99.30%	99.30%	Genscan Prediction
Paralogues	Sly	ENSMUSG00000094181	Gm21739	Region ComparisonAlignment (protein)Alignment (cDNA)	Y	44232123	44264444	-1	32321	95.95%	95.95%	blat seed
Blat	Sly		Prediction	Blat	Y	46481155	46513231	1	32076	99.30%	99.30%	Genscan Prediction
Paralogues	Sly	ENSMUSG00000094782	Gm21256	Region ComparisonAlignment (protein)Alignment (cDNA)	Y	47450960	47482990	1	32030	95.95%	95.95%
Blat	Sly		Gm20901	Blat	Y	47669088	47692545	-1	23457	98.00%	98.00%
Paralogues	Sly	ENSMUSG00000101653	Gm20792	Region ComparisonAlignment (protein)Alignment (cDNA)	Y	48311855	48343871	1	32016	95.95%	95.95%
Blat	Sly		Gm20901	Blat	Y	48529995	48553436	-1	23441	98.10%	98.10%
Paralogues	Sly	ENSMUSG00000100972	Gm28553	Region ComparisonAlignment (protein)Alignment (cDNA)	Y	48856497	48882617	1	26120	99.10%	99.10%
Paralogues	Sly	ENSMUSG00000095979	Gm21209	Region ComparisonAlignment (protein)Alignment (cDNA)	Y	49571156	49597425	1	26269	99.10%	99.10%
Paralogues	Sly	ENSMUSG00000100338	Gm28870	Region ComparisonAlignment (protein)Alignment (cDNA)	Y	50097276	50122131	1	24855	98.65%	98.65%
Paralogues	Sly	ENSMUSG00000102122	Gm20883	Region ComparisonAlignment (protein)Alignment (cDNA)	Y	50608251	50634461	1	26210	100.00%	100.00%
Paralogues	Sly	ENSMUSG00000096769	Gm21117	Region ComparisonAlignment (protein)Alignment (cDNA)	Y	51125220	51151484	1	26264	98.65%	98.65%	blat seed
Paralogues	Sly	ENSMUSG00000100485	Gm20920	Region ComparisonAlignment (protein)Alignment (cDNA)	Y	51852120	51878300	1	26180	100.00%	100.00%
Blat	Sly		Prediction	Blat	Y	52445833	52472106	-1	26273	99.90%	99.90%	Genscan Prediction
Paralogues	Sly	ENSMUSG00000095606	Gm21258	Region ComparisonAlignment (protein)Alignment (cDNA)	Y	52780040	52806254	1	26214	99.55%	99.55%
Paralogues	Sly	ENSMUSG00000100045	Gm20929	Region ComparisonAlignment (protein)Alignment (cDNA)	Y	53843949	53870150	1	26201	100.00%	100.00%
Blat	Sly		Prediction	Blat	Y	54655460	54681659	-1	26199	99.30%	99.30%	Augustus and Genscan Predictions
Paralogues	Sly	ENSMUSG00000094570	Gm20931	Region ComparisonAlignment (protein)Alignment (cDNA)	Y	55213720	55239871	1	26151	100.00%	100.00%
Paralogues	Sly	ENSMUSG00000095135	Gm21858	Region ComparisonAlignment (protein)Alignment (cDNA)	Y	55731756	55757908	1	26152	99.10%	99.10%
Blat	Sly		Prediction	Blat	Y	56500806	56524171	1	23365	99.50%	99.50%	Genscan Prediction
Paralogues	Sly	ENSMUSG00000101155	Sly	Region ComparisonAlignment (protein)Alignment (cDNA)	Y	57187188	57213362	1	26174	100%	100%	blat seed
Paralogues	Sly	ENSMUSG00000101399	Gm28961	Region ComparisonAlignment (protein)Alignment (cDNA)	Y	57705697	57731932	1	26235	98.65%	98.65%
Paralogues	Sly	ENSMUSG00000096626	Gm21861	Region ComparisonAlignment (protein)Alignment (cDNA)	Y	58782567	58814597	-1	32030	95.95%	95.95%
Blat	Sly		Prediction	Blat	Y	59395254	59427391	1	32137	99.30%	99.30%	Genscan Prediction
Paralogues	Sly	ENSMUSG00000095141	Gm28891	Region ComparisonAlignment (protein)Alignment (cDNA)	Y	60241202	60273250	1	32048	95.95%	95.95%
Blat	Sly		Gm20901	Blat	Y	60459468	60482928	-1	23460	98.00%	98.00%
Paralogues	Sly		1700040F15Rik	Region ComparisonAlignment (protein)Alignment (cDNA)	Y	61102247	61134259	1	32012	95.95%	95.95%
Blat	Sly	ENSMUSG00000100667	Gm20901	Blat	Y	61320380	61343824	-1	23444	98.10%	98.10%
Paralogues	Sly	ENSMUSG00000100726	Gm21497	Region ComparisonAlignment (protein)Alignment (cDNA)	Y	61646746	61672861	1	26115	99.10%	99.10%
Paralogues	Sly	ENSMUSG00000094821	Gm21518	Region ComparisonAlignment (protein)Alignment (cDNA)	Y	62190866	62217137	1	26271	99.10%	99.10%
Paralogues	Sly	ENSMUSG00000100856	Gm21627	Region ComparisonAlignment (protein)Alignment (cDNA)	Y	63228427	63254644	1	26217	100.00%	98.65%
Blat	Sly		Prediction	Blat	Y	63746497	63772759	1	26262	100.00%	100.00%	Genscan Prediction
Paralogues	Sly	ENSMUSG00000101766	Gm20908	Region ComparisonAlignment (protein)Alignment (cDNA)	Y	64473266	64499452	1	26186	100.00%	100.00%
Blat	Sly		Prediction	Blat	Y	65043509	65068886	-1	25377	99.90%	99.90%	Genscan Prediction
Paralogues	Sly	ENSMUSG00000093993	Gm20736	Region ComparisonAlignment (protein)Alignment (cDNA)	Y	65377690	65403917	1	26227	99.47%	84.23%
Blat	Sly		Prediction	Blat	Y	67606654	67632890	-1	26236	100.00%	100.00%	Genscan Prediction
Paralogues	Sly	ENSMUSG00000096016	Gm20937	Region ComparisonAlignment (protein)Alignment (cDNA)	Y	68268651	68294898	-1	26247	99.10%	99.10%
Paralogues	Sly	ENSMUSG00000100032	Gm20817	Region ComparisonAlignment (protein)Alignment (cDNA)	Y	68806596	68832728	-1	26132	99.10%	99.10%
Paralogues	Sly	ENSMUSG00000094616	Gm20888	Region ComparisonAlignment (protein)Alignment (cDNA)	Y	70441882	70468158	1	26276	99.10%	99.10%
Paralogues	Sly	ENSMUSG00000099531	Gm20869	Region ComparisonAlignment (protein)Alignment (cDNA)	Y	71469449	71495632	1	26183	100.00%	100.00%
Paralogues	Sly	ENSMUSG00000100535	Gm20870	Region ComparisonAlignment (protein)Alignment (cDNA)	Y	71692043	71718226	1	26183	100.00%	100.00%
Paralogues	Sly	ENSMUSG00000096902	Gm20843	Region ComparisonAlignment (protein)Alignment (cDNA)	Y	72220863	72247118	-1	26255	99.10%	99.10%
Blat	Sly		Gm20736	Blat	Y	72554845	72581063	1	26218	99.40%	99.40%
Paralogues	Sly	ENSMUSG00000099782	Gm20903	Region ComparisonAlignment (protein)Alignment (cDNA)	Y	73669315	73695486	1	26171	100.00%	100.00%
Paralogues	Sly	ENSMUSG00000101528	Gm29110	Region ComparisonAlignment (protein)Alignment (cDNA)	Y	74470531	74496958	1	26427	99.10%	99.10%
Paralogues	Sly	ENSMUSG00000101146	Gm20814	Region ComparisonAlignment (protein)Alignment (cDNA)	Y	75195856	75222058	1	26202	100.00%	100.00%
Paralogues	Sly	ENSMUSG00000100902	Gm20850	Region ComparisonAlignment (protein)Alignment (cDNA)	Y	75715322	75741549	1	26227	100.00%	100.00%
Blat	Sly		Prediction	Blat	Y	76232628	76258850	1	26222	99.40%	99.40%	Genscan Prediction
Paralogues	Sly	ENSMUSG00000100708	Gm21173	Region ComparisonAlignment (protein)Alignment (cDNA)	Y	76761600	76787729	1	26129	99.10%	99.10%
Paralogues	Sly	ENSMUSG00000094647	Gm21650	Region ComparisonAlignment (protein)Alignment (cDNA)	Y	77692808	77719038	1	26230	98.65%	98.65%	blat seed
Paralogues	Sly	ENSMUSG00000099792	Gm29564	Region ComparisonAlignment (protein)Alignment (cDNA)	Y	78212993	78239189	1	26196	99.10%	99.10%
Paralogues	Sly	ENSMUSG00000094746	Gm20916	Region ComparisonAlignment (protein)Alignment (cDNA)	Y	79319565	79345707	1	26142	100.00%	100.00%
Paralogues	Sly	ENSMUSG00000095578	Gm21760	Region ComparisonAlignment (protein)Alignment (cDNA)	Y	80133779	80159975	1	26196	99.10%	99.10%
Paralogues	Sly	ENSMUSG00000099740	Gm28897	Region ComparisonAlignment (protein)Alignment (cDNA)	Y	80926995	80953258	1	26263	99.10%	99.10%
Paralogues	Sly	ENSMUSG00000099894	Gm20911	Region ComparisonAlignment (protein)Alignment (cDNA)	Y	81458007	81484087	1	26080	99.10%	99.10%
Paralogues	Sly	ENSMUSG00000101286	Gm21317	Region ComparisonAlignment (protein)Alignment (cDNA)	Y	82225227	82251419	1	26192	100.00%	100.00%
Paralogues	Sly	ENSMUSG00000099925	Gm28827	Region ComparisonAlignment (protein)Alignment (cDNA)	Y	83030947	83057301	1	26354	99.10%	99.10%
Paralogues	Sly	ENSMUSG00000095153	Gm21095	Region ComparisonAlignment (protein)Alignment (cDNA)	Y	84097279	84123494	1	26215	99.55%	99.55%
Paralogues	Sly	ENSMUSG00000099840	Gm21409	Region ComparisonAlignment (protein)Alignment (cDNA)	Y	84746685	84772902	1	26217	100.00%	100.00%
Paralogues	Sly	ENSMUSG00000100240	Gm20820	Region ComparisonAlignment (protein)Alignment (cDNA)	Y	86061772	86087952	1	26180	99.55%	99.55%
Paralogues	Sly	ENSMUSG00000094399	Gm21477	Region ComparisonAlignment (protein)Alignment (cDNA)	Y	87116821	87142917	1	26096	100.00%	100.00%
Paralogues	Sly	ENSMUSG00000099856	Gm20906	Region ComparisonAlignment (protein)Alignment (cDNA)	Y	87550966	87575691	1	24725	100.00%	100.00%
Paralogues	Sly	ENSMUSG00000101915	Gm28102	Region ComparisonAlignment (protein)Alignment (cDNA)	Y	88053315	88079494	1	26179	99.10%	99.10%
Paralogues	Sly	ENSMUSG00000102045	Gm21294	Region ComparisonAlignment (protein)Alignment (cDNA)	Y	89052806	89079015	1	26209	99.10%	99.10%
Paralogues	Sly	ENSMUSG00000100608	Gm21996	Region ComparisonAlignment (protein)Alignment (cDNA)	Y	89713424	89745532	-1	32108	96.40%	96.40%	blat seed
Paralogues	Sly	ENSMUSG00000096178	Gm20837	Region ComparisonAlignment (protein)Alignment (cDNA)	Y	90401248	90433263	1	32015	96.81%	81.98%	blat seed
Blat	Sstx		retro-Spin1	Blat	X	3276779	3278604	1	1825	97.70%	97.70%
Blat	Sstx		retro-Spin1	Blat	X	3327055	3328785	-1	1730	89.40%	89.40%
Blat	Sstx		Gm21637; spin2-ps1; retro-Spin1	Blat	X	3835824	3837651	1	1827	97.80%	97.80%
Blat	Sstx		retro-Gm20854	Blat	X	4076575	4078082	1	1507	87.50%	87.50%
Blat	Sstx		retro-Spin1	Blat	X	4118153	4120008	-1	1855	98.20%	98.20%
Blat	Sstx		retro-Spin1	Blat	X	4454255	4456104	-1	1849	98.00%	98.00%
Blat	Sstx		retro-Spin1	Blat	X	4673220	4675045	-1	1825	98.20%	98.20%
Blat	Sstx		retro-Gm20854	Blat	X	4839157	4840664	1	1507	87.70%	87.70%
Blat	Sstx		retro-Spin1	Blat	X	4881308	4883163	-1	1855	98.60%	98.60%
Blat	Sstx		retro-Spin1	Blat	X	5276658	5278413	1	1755	90.30%	90.30%
Blat	Sstx		retro-Spin1	Blat	X	5338731	5340528	-1	1797	98.10%	98.10%
Blat	Sstx		retro-Spin1	Blat	X	31210068	31211820	1	1752	90.00%	90.00%
Paralogues	Sstx	ENSMUSG00000095754	Spin2f	Region ComparisonAlignment (protein)Alignment (cDNA)	X	31253603	31255454	1	1851	89.76%	96.61%	blat seed
Paralogues	Sstx	ENSMUSG00000096645	Spin2e	Region ComparisonAlignment (protein)Alignment (cDNA)	X	31618138	31619994	-1	1856	97.46%	97.46%	blat seed
Blat	Sstx		Gm21637; spin2-ps1; retro-Spin1	Blat	X	31961049	31962876	-1	1827	97.90%	97.90%
Blat	Sstx		retro-Spin1	Blat	X	32158568	32160423	-1	1855	99.60%	99.60%
Blat	Sstx		retro-Gm20854	Blat	X	32317300	32318925	1	1625	89.50%	89.50%
Blat	Sstx		retro-Spin1	Blat	X	32437041	32438896	-1	1855	99.70%	99.70%
Blat	Sstx		retro-Spin1	Blat	X	32600234	32601985	1	1751	90.20%	90.20%
Paralogues	Sstx	ENSMUSG00000094601	Gm5926	Region ComparisonAlignment (protein)Alignment (cDNA)	X	32649793	32651476	1	1683	100.00%	100.00%	blat seed
Blat	Sstx		retro-Gm20854	Blat	X	33012767	33014274	1	1507	87.60%	87.60%
Blat	Sstx		retro-Spin1	Blat	X	33055321	33057118	-1	1797	97.50%	97.50%
Blat	Sstx		retro-Spin1	Blat	X	33233643	33235470	-1	1827	97.70%	97.70%
Blat	Sstx		retro-Gm20854	Blat	X	33352151	33353789	1	1638	89.40%	89.40%
Parent	Sstx		retro-Spin1	Region ComparisonAlignment (protein)Alignment (cDNA)	X	33398517	33400130	1	1613	100.00%	100.00%	blat seed
Blat	Sstx		retro-Spin1	Blat	X	33476905	33478760	1	1855	98.60%	98.60%
Blat	Sstx		retro-Spin1	Blat	X	33777751	33779577	1	1826	97.50%	97.50%
Blat	Sstx		retro-Spin1	Blat	X	33829897	33831425	1	1528	90.50%	90.50%
Paralogues	Sstx	ENSMUSG00000095659	Spin2g	Region ComparisonAlignment (protein)Alignment (cDNA)	X	34237049	34238733	-1	1684	96.61%	96.61%	blat seed
Blat	Sstx		retro-Spin1	Blat	X	34296623	34298376	-1	1753	89.70%	89.70%
Blat	Sstx		retro-Spin1	Blat	X	34565940	34567693	1	1753	90.30%	90.30%
Blat	Sstx		retro-Spin1	Blat	X	34606280	34608103	-1	1823	98.30%	98.30%
Paralogues	Sstx	ENSMUSG00000079566	Spin2d	Region ComparisonAlignment (protein)Alignment (cDNA)	X	73175302	73176989	-1	1687	95.76%	95.76%	blat seed
Blat	Sstx		retro-Spin1	Blat	X	74677194	74679105	1	1911	97.70%	97.70%
Blat	Sstx		retro-Spin1	Blat	X	74803784	74805634	-1	1850	97.70%	97.70%
Blat	Sstx		retro-Spin1	Blat	X	74889589	74891441	1	1852	97.90%	97.90%
Paralogues	Ssty1	ENSMUSG00000096706	Gm21854	Region ComparisonAlignment (protein)Alignment (cDNA)	Y	5656986	5659574	1	2588	94.40%	94.40%	blat seed
Paralogues	Ssty1	ENSMUSG00000096036	Gm21778	Region ComparisonAlignment (protein)Alignment (cDNA)	Y	5942460	5945031	1	2571	95.69%	95.69%	blat seed
Paralogues	Ssty1	ENSMUSG00000095148	Gm20873	Region ComparisonAlignment (protein)Alignment (cDNA)	Y	6267098	6269548	1	2450	96.98%	96.98%	blat seed
Blat	Ssty1		retro-M38247.1-75	Blat	Y	6304098	6306556	-1	2458	94.10%	94.10%
Blat	Ssty1		Gm21719	Blat	Y	6680420	6682872	1	2452	93.80%	93.80%
Blat	Ssty1		retro-Gm20854	Blat	Y	6717415	6719866	1	2451	97.40%	97.40%
Blat	Ssty1		retro-Gm20854	Blat	Y	8137314	8139576	-1	2262	97.00%	97.00%
Blat	Ssty1		retro-Gm20854	Blat	Y	8381280	8383919	1	2639	98.80%	98.80%
Blat	Ssty1		retro-Gm20854	Blat	Y	8635409	8637994	-1	2585	98.60%	98.60%
Blat	Ssty1		retro-Gm20854	Blat	Y	9267440	9270026	-1	2586	98.60%	98.60%
Paralogues	Ssty1	ENSMUSG00000096223	Gm21874	Region ComparisonAlignment (protein)Alignment (cDNA)	Y	9413518	9416148	-1	2630	93.10%	93.10%	blat seed
Paralogues	Ssty1	ENSMUSG00000095032	Gm21310	Region ComparisonAlignment (protein)Alignment (cDNA)	Y	10144735	10147183	-1	2448	98.28%	98.28%	blat seed
Blat	Ssty1		retro-M38247.1-123	Blat	Y	10496697	10499155	-1	2458	93.70%	93.70%
Paralogues	Ssty1	ENSMUSG00000095950	Gm20737	Region ComparisonAlignment (protein)Alignment (cDNA)	Y	10533609	10536042	-1	2433	98.71%	98.71%	blat seed
Blat	Ssty1		retro-M38247.1-126	Blat	Y	10712980	10715422	1	2442	94.00%	94.00%
Paralogues	Ssty1	ENSMUSG00000094813	Gm20777	Region ComparisonAlignment (protein)Alignment (cDNA)	Y	10750004	10752450	-1	2446	98.71%	98.71%	blat seed
Blat	Ssty1		retro-Gm20854	Blat	Y	11800418	11802851	1	2433	96.30%	96.30%
Paralogues	Ssty1	ENSMUSG00000104267	Gm20807	Region ComparisonAlignment (protein)Alignment (cDNA)	Y	13042891	13045326	1	2435	97.84%	97.84%	blat seed
Blat	Ssty1		Gm20807	Blat	Y	13043320	13045326	1	2006	97.50%	97.50%
Paralogues	Ssty1	ENSMUSG00000096820	Gm21425	Region ComparisonAlignment (protein)Alignment (cDNA)	Y	13161968	13164408	1	2440	98.71%	98.71%	blat seed
Paralogues	Ssty1	ENSMUSG00000103468	Gm21440	Region ComparisonAlignment (protein)Alignment (cDNA)	Y	13252391	13254834	1	2443	98.71%	98.71%	blat seed
Paralogues	Ssty1	ENSMUSG00000093903	Gm21454	Region ComparisonAlignment (protein)Alignment (cDNA)	Y	13376362	13378804	1	2442	100.00%	100.00%	NA
Paralogues	Ssty1	ENSMUSG00000095900	Gm20773	Region ComparisonAlignment (protein)Alignment (cDNA)	Y	13494026	13496466	1	2440	97.84%	97.84%	blat seed
Blat	Ssty1		retro-Gm20854	Blat	Y	13530992	13533634	-1	2642	98.60%	98.60%
Blat	Ssty1		retro-M38247.1-149	Blat	Y	13873248	13875700	-1	2452	94.00%	94.00%
Blat	Ssty1		retro-Gm20854	Blat	Y	13910218	13912647	-1	2429	99.40%	99.40%
Blat	Ssty1		retro-Gm20854	Blat	Y	14029574	14032015	-1	2441	99.70%	99.70%
Blat	Ssty1		retro-Gm20854	Blat	Y	16485782	16488216	1	2434	96.00%	96.00%
Blat	Ssty1		retro-Gm20854	Blat	Y	17755891	17758330	-1	2439	98.60%	98.60%
Paralogues	Ssty1	ENSMUSG00000102739	Gm20772	Region ComparisonAlignment (protein)Alignment (cDNA)	Y	17874741	17877179	1	2438	98.71%	98.71%	blat seed
Paralogues	Ssty1	ENSMUSG00000094325	Gm20831	Region ComparisonAlignment (protein)Alignment (cDNA)	Y	17965160	17967603	1	2443	98.71%	98.71%	NA
Parent	Ssty1		SSty1	Parent	Y	18089116	18091556	1	2440	100.00%	100.00%	blat seed
Blat	Ssty1		retro-M38247.1-174	Blat	Y	18206865	18209302	-1	2437	98.70%	98.70%
Blat	Ssty1		retro-Gm20854	Blat	Y	18243801	18246447	-1	2646	98.70%	98.70%
Blat	Ssty1		retro-M38247.1-177	Blat	Y	18585960	18588412	-1	2452	93.90%	93.90%
Blat	Ssty1		retro-Gm20854	Blat	Y	18622939	18625368	-1	2429	99.40%	99.40%
Blat	Ssty1		retro-Gm20854	Blat	Y	18742342	18744783	-1	2441	99.70%	99.70%
Blat	Ssty1		Gm21454	Blat	Y	21095280	21097719	-1	2439	98.50%	98.50%
Blat	Ssty1		retro-Gm20854	Blat	Y	21617909	21620548	-1	2639	97.80%	97.80%
Blat	Ssty1		retro-Gm20854	Blat	Y	22152818	22155395	1	2577	97.80%	97.80%
Blat	Ssty1		retro-Gm20854	Blat	Y	22445841	22448099	1	2258	97.00%	97.00%
Blat	Ssty1		retro-Gm20854	Blat	Y	22962975	22965611	-1	2636	97.50%	97.50%
Blat	Ssty1		retro-Gm20854	Blat	Y	23238440	23241081	-1	2641	97.80%	97.80%
Blat	Ssty1		retro-Gm20854	Blat	Y	23800360	23802989	-1	2629	97.70%	97.70%
Blat	Ssty1		retro-Gm20854	Blat	Y	24313639	24316268	-1	2629	97.50%	97.50%
Blat	Ssty1		retro-Gm20854	Blat	Y	24826787	24829417	-1	2630	97.50%	97.50%
Blat	Ssty1		retro-Gm20854	Blat	Y	25339901	25342531	-1	2630	97.50%	97.50%
Blat	Ssty1		retro-Gm20854	Blat	Y	25852961	25855592	-1	2631	97.60%	97.60%
Blat	Ssty1		retro-Gm20854	Blat	Y	26366098	26368728	-1	2630	97.60%	97.60%
Blat	Ssty1		retro-Gm20854	Blat	Y	26879317	26881950	-1	2633	97.80%	97.80%
Blat	Ssty1		retro-Gm20854	Blat	Y	27111178	27113808	-1	2630	97.60%	97.60%
Blat	Ssty1		retro-Gm20854	Blat	Y	27624426	27627059	-1	2633	97.80%	97.80%
Blat	Ssty1		retro-Gm20854	Blat	Y	27856164	27858794	-1	2630	97.60%	97.60%
Blat	Ssty1		retro-Gm20854	Blat	Y	28375568	28378198	-1	2630	97.60%	97.60%
Blat	Ssty1		retro-Gm20854	Blat	Y	28702306	28704563	-1	2257	94.20%	94.20%
Blat	Ssty1		retro-Gm20854	Blat	Y	34418318	34420952	-1	2634	97.40%	97.40%
Blat	Ssty1		retro-Gm20854	Blat	Y	34712741	34715371	-1	2630	97.70%	97.70%
Blat	Ssty1		retro-Gm20854	Blat	Y	35233517	35236162	-1	2645	97.70%	97.70%
Blat	Ssty1		retro-Gm20854	Blat	Y	35501251	35503888	-1	2637	97.80%	97.80%
Blat	Ssty1		retro-Gm20854	Blat	Y	36023375	36026004	-1	2629	97.80%	97.80%
Blat	Ssty1		retro-Gm20854	Blat	Y	36837964	36840597	-1	2633	97.70%	97.70%
Blat	Ssty1		retro-Gm20854	Blat	Y	37362240	37364874	-1	2634	97.80%	97.80%
Blat	Ssty1		retro-Gm20854	Blat	Y	37816248	37818899	-1	2651	97.70%	97.70%
Blat	Ssty1		retro-Gm20854	Blat	Y	38603863	38606504	-1	2641	97.90%	97.90%
Blat	Ssty1		retro-Gm20854	Blat	Y	40680428	40682867	-1	2439	98.80%	98.80%
Paralogues	Ssty1	ENSMUSG00000095452	Gm20795	Region ComparisonAlignment (protein)Alignment (cDNA)	Y	40804914	40807356	1	2442	98.28%	98.28%	blat seed
Blat	Ssty1		retro-M38247.1-363	Blat	Y	40841935	40844388	-1	2453	94.30%	94.30%
Blat	Ssty1		retro-Gm20854	Blat	Y	41338700	41341175	1	2475	94.90%	94.90%
Blat	Ssty1		retro-Gm20854	Blat	Y	41375606	41378046	-1	2440	99.50%	99.50%
Blat	Ssty1		retro-Gm20854	Blat	Y	48736194	48738829	1	2635	97.70%	97.70%
Blat	Ssty1		retro-Gm20854	Blat	Y	49467158	49469599	-1	2441	96.60%	96.60%
Blat	Ssty1		retro-Gm20854	Blat	Y	49983886	49986156	-1	2270	96.70%	96.70%
Blat	Ssty1		retro-Gm20854	Blat	Y	50501386	50503646	-1	2260	97.10%	97.10%
Blat	Ssty1		retro-Gm20854	Blat	Y	51020970	51023548	-1	2578	98.20%	98.20%
Blat	Ssty1		retro-Gm20854	Blat	Y	51746900	51749161	-1	2261	97.00%	97.00%
Blat	Ssty1		retro-Gm20854	Blat	Y	52328206	52330461	-1	2255	97.10%	97.10%
Blat	Ssty1		retro-Gm20854	Blat	Y	52674793	52677382	-1	2589	98.00%	98.00%
Blat	Ssty1		retro-Gm20854	Blat	Y	53191720	53194293	-1	2573	98.10%	98.10%
Blat	Ssty1		retro-Gm20854	Blat	Y	53485249	53487511	-1	2262	97.20%	97.20%
Blat	Ssty1		retro-Gm20854	Blat	Y	53781389	53783971	-1	2582	97.80%	97.80%
Blat	Ssty1		retro-Gm20854	Blat	Y	54252495	54254500	1	2005	97.10%	97.10%	pseduogene of Gm20854
Blat	Ssty1		retro-Gm20854	Blat	Y	54555486	54558125	1	2639	97.90%	97.90%
Blat	Ssty1		retro-Gm20854	Blat	Y	55109741	55111755	-1	2014	97.20%	97.20%
Blat	Ssty1		retro-Gm20854	Blat	Y	55624122	55626710	-1	2588	98.00%	98.00%
Blat	Ssty1		retro-Gm20854	Blat	Y	56084709	56086966	-1	2257	97.10%	97.10%
Blat	Ssty1		retro-Gm20854	Blat	Y	56390031	56392612	-1	2581	98.00%	98.00%
Blat	Ssty1		retro-Gm20854	Blat	Y	57083219	57085800	-1	2581	97.80%	97.80%
Blat	Ssty1		retro-Gm20854	Blat	Y	57598052	57600639	-1	2587	98.10%	98.10%
Blat	Ssty1		retro-Gm20854	Blat	Y	61526455	61529090	1	2635	97.70%	97.70%
Blat	Ssty1		retro-Gm20854	Blat	Y	62086813	62089254	-1	2441	96.60%	96.60%
Blat	Ssty1		retro-Gm20854	Blat	Y	62603624	62605896	-1	2272	96.70%	96.70%
Blat	Ssty1		retro-Gm20854	Blat	Y	63121395	63123656	-1	2261	97.10%	97.10%
Blat	Ssty1		retro-Gm20854	Blat	Y	63642246	63644501	-1	2255	97.10%	97.10%
Blat	Ssty1		retro-Gm20854	Blat	Y	64368033	64370622	-1	2589	98.10%	98.10%
Blat	Ssty1		retro-Gm20854	Blat	Y	64924956	64927211	-1	2255	97.10%	97.10%
Blat	Ssty1		retro-Gm20854	Blat	Y	65272455	65275044	-1	2589	98.00%	98.00%
Blat	Ssty1		retro-Gm20854	Blat	Y	65789428	65792056	1	2628	97.80%	97.80%
Blat	Ssty1		retro-Gm20854	Blat	Y	66121759	66124399	-1	2640	97.90%	97.90%
Blat	Ssty1		retro-Gm20854	Blat	Y	66336783	66339365	1	2582	97.80%	97.80%
Blat	Ssty1		retro-Gm20854	Blat	Y	66806440	66808445	1	2005	97.10%	97.10%	pseduogene of Gm20854
Blat	Ssty1		retro-Gm20854	Blat	Y	67112380	67114641	-1	2261	97.00%	97.00%
Blat	Ssty1		retro-Gm20854	Blat	Y	67405589	67408168	-1	2579	98.20%	98.20%
Blat	Ssty1		retro-M38247.1-603	Blat	Y	67543253	67545714	1	2461	94.10%	94.10%
Blat	Ssty1		retro-M38247.1-606	Blat	Y	67756063	67758520	1	2457	94.00%	94.00%
Blat	Ssty1		retro-Gm20854	Blat	Y	68396548	68399187	-1	2639	97.80%	97.80%
Blat	Ssty1		retro-Gm20854	Blat	Y	68949477	68952112	-1	2635	97.80%	97.80%
Blat	Ssty1		retro-Gm20854	Blat	Y	69284292	69286926	-1	2634	97.60%	97.60%
Blat	Ssty1		retro-Gm20854	Blat	Y	70049343	70051930	-1	2587	98.10%	98.10%
Blat	Ssty1		retro-Gm20854	Blat	Y	70337799	70340247	1	2448	96.80%	96.80%
Blat	Ssty1		retro-Gm20854	Blat	Y	71364186	71366445	-1	2259	97.00%	97.00%
Blat	Ssty1		retro-Gm20854	Blat	Y	72103263	72105896	1	2633	98.00%	98.00%
Blat	Ssty1		retro-M38247.1-667	Blat	Y	72157361	72159821	1	2460	94.10%	94.10%
Blat	Ssty1		retro-Gm20854	Blat	Y	72449656	72451916	-1	2260	96.90%	96.90%
Blat	Ssty1		retro-Gm20854	Blat	Y	73034319	73036891	-1	2572	98.20%	98.20%
Blat	Ssty1		retro-Gm20854	Blat	Y	73383163	73385743	-1	2580	97.90%	97.90%
Blat	Ssty1		retro-Gm20854	Blat	Y	73606739	73609325	-1	2586	97.80%	97.80%
Blat	Ssty1		retro-Gm20854	Blat	Y	74077975	74080231	-1	2256	97.00%	97.00%
Blat	Ssty1		retro-Gm20854	Blat	Y	74366659	74369301	1	2642	98.00%	98.00%
Blat	Ssty1		retro-Gm20854	Blat	Y	75091773	75094363	-1	2590	98.20%	98.20%
Blat	Ssty1		retro-Gm20854	Blat	Y	75605563	75608201	1	2638	98.00%	98.00%
Blat	Ssty1		retro-Gm20854	Blat	Y	76127360	76129626	-1	2266	96.80%	96.80%
Blat	Ssty1		retro-Gm20854	Blat	Y	76642141	76644401	-1	2260	97.10%	97.10%
Blat	Ssty1		retro-Gm20854	Blat	Y	77215098	77217611	-1	2513	96.90%	96.90%
Blat	Ssty1		retro-Gm20854	Blat	Y	78101381	78103959	-1	2578	98.20%	98.20%
Blat	Ssty1		retro-Gm20854	Blat	Y	78609275	78611857	-1	2582	97.80%	97.80%
Blat	Ssty1		retro-Gm20854	Blat	Y	78902192	78904774	-1	2582	97.70%	97.70%
Blat	Ssty1		retro-Gm20854	Blat	Y	79215216	79217476	-1	2260	96.60%	96.60%
Blat	Ssty1		retro-Gm20854	Blat	Y	79731393	79733405	-1	2012	97.20%	97.20%
Blat	Ssty1		retro-Gm20854	Blat	Y	80022308	80024887	-1	2579	98.20%	98.20%
Blat	Ssty1		retro-Gm20854	Blat	Y	80529696	80531710	1	2014	96.90%	96.90%
Blat	Ssty1		retro-Gm20854	Blat	Y	80822631	80825266	1	2635	98.00%	98.00%
Blat	Ssty1		retro-Gm20854	Blat	Y	81351210	81353471	-1	2261	97.20%	97.20%
Blat	Ssty1		retro-Gm20854	Blat	Y	81868470	81871111	1	2641	97.80%	97.80%
Blat	Ssty1		retro-Gm20854	Blat	Y	82162614	82165202	-1	2588	98.00%	98.00%
Blat	Ssty1		retro-Gm20854	Blat	Y	82633779	82636036	-1	2257	97.10%	97.10%
Blat	Ssty1		retro-M38247.1-818	Blat	Y	82927610	82930246	1	2636	97.80%	97.80%
Blat	Ssty1		retro-Gm20854	Blat	Y	83427582	83430217	1	2635	98.00%	98.00%
Blat	Ssty1		retro-Gm20867	Blat	Y	83993525	83996156	1	2631	97.60%	97.60%
Blat	Ssty1		retro-Gm20854	Blat	Y	84628572	84631203	1	2631	97.90%	97.90%
Blat	Ssty1		retro-Gm20854	Blat	Y	85234543	85236806	-1	2263	97.40%	97.40%
Blat	Ssty1		retro-Gm20854	Blat	Y	85595087	85597098	-1	2011	96.70%	96.70%
Blat	Ssty1		retro-Gm20854	Blat	Y	85955424	85957435	-1	2011	96.70%	96.70%
Blat	Ssty1		retro-Gm20854	Blat	Y	87447047	87449631	-1	2584	97.80%	97.80%
Blat	Ssty1		retro-Gm20854	Blat	Y	87948554	87951136	-1	2582	98.10%	98.10%
Blat	Ssty1		retro-Gm20854	Blat	Y	88260160	88262748	-1	2588	98.10%	98.10%
Blat	Ssty1		retro-Gm20854	Blat	Y	88952238	88954751	1	2513	97.20%	97.20%
Blat	Ssty1		retro-M38247.1-903	Blat	Y	89654971	89657434	-1	2463	94.20%	94.20%
Paralogues	Ssty2	ENSMUSG00000093927	Gm20918	Region ComparisonAlignment (protein)Alignment (cDNA)	Y	5043937	5046265	1	2328	91.19%	91.19%	blat seed
Blat	Ssty2		Retro-Gm20854	Blat	Y	5145318	5147703	1	2385	96.50%	96.50%
Paralogues	Ssty2	ENSMUSG00000096268	Gm20914	Region ComparisonAlignment (protein)Alignment (cDNA)	Y	5725978	5728317	1	2339	96.04%	96.04%	blat seed
Paralogues	Ssty2	ENSMUSG00000100634	Gm28171	Region ComparisonAlignment (protein)Alignment (cDNA)	Y	5793395	5795728	1	2333	93.83%	93.83%	blat seed
Blat	Ssty2		Retro-Gm20854	Blat	Y	6016804	6019216	-1	2412	98.20%	98.20%
Blat	Ssty2		Retro-Gm20854	Blat	Y	6082950	6085346	-1	2396	95.40%	95.40%
Blat	Ssty2		Retro-Gm20854	Blat	Y	6869466	6872387	1	2921	92.40%	92.40%
Paralogues	Ssty2	ENSMUSG00000096686	Gm20830	Region ComparisonAlignment (protein)Alignment (cDNA)	Y	6916300	6918282	-1	1982	89.87%	89.87%	blat seed
Blat	Ssty2		retro-M38247.1-82	Blat	Y	7027184	7029576	-1	2392	92.80%	92.80%
Paralogues	Ssty2	ENSMUSG00000094484	Gm21244	Region ComparisonAlignment (protein)Alignment (cDNA)	Y	7165068	7169293	-1	4225	93.39%	93.39%	blat seed
Paralogues	Ssty2	ENSMUSG00000094081	Gm20826	Region ComparisonAlignment (protein)Alignment (cDNA)	Y	7632774	7638489	-1	5715	93.39%	93.39%	blat seed
Paralogues	Ssty2	ENSMUSG00000099861	Gm29049	Region ComparisonAlignment (protein)Alignment (cDNA)	Y	7994833	7997168	-1	2335	95.15%	95.15%	blat seed
Paralogues	Ssty2	ENSMUSG00000095324	Gm20825	Region ComparisonAlignment (protein)Alignment (cDNA)	Y	8069168	8071507	-1	2339	97.36%	97.36%	blat seed
Blat	Ssty2		Retro-Gm20854	Blat	Y	8498697	8500701	-1	2004	94.60%	94.60%
Blat	Ssty2		Retro-Gm20854	Blat	Y	8569939	8571961	1	2022	99.10%	99.10%
Blat	Ssty2		Retro-Gm20854	Blat	Y	8763545	8766463	1	2918	97.80%	97.80%
Paralogues	Ssty2	ENSMUSG00000101053	Gm20815	Region ComparisonAlignment (protein)Alignment (cDNA)	Y	8832821	8835169	-1	2348	96.92%	96.92%	blat seed
Paralogues	Ssty2	ENSMUSG00000091077	Gm21292	Region ComparisonAlignment (protein)Alignment (cDNA)	Y	9130999	9133924	-1	2925	95.59%	95.59%	blat seed
Paralogues	Ssty2	ENSMUSG00000094679	Gm21721	Region ComparisonAlignment (protein)Alignment (cDNA)	Y	9199824	9202190	-1	2366	93.39%	93.39%	blat seed
Paralogues	Ssty2	ENSMUSG00000094773	Gm21812	Region ComparisonAlignment (protein)Alignment (cDNA)	Y	9344836	9347184	-1	2348	95.15%	95.15%	blat seed
Blat	Ssty2		Retro-Gm20854	Blat	Y	9550866	9553254	1	2388	95.50%	95.50%
Paralogues	Ssty2	ENSMUSG00000094556	Gm20821	Region ComparisonAlignment (protein)Alignment (cDNA)	Y	9781804	9784197	1	2393	93.39%	93.39%	blat seed
Blat	Ssty2		retro-M38247.1-117	Blat	Y	10018941	10021286	1	2345	93.50%	93.50%
Blat	Ssty2		Retro-Gm20854	Blat	Y	10065663	10067635	1	1972	95.80%	95.80%
Blat	Ssty2		Retro-Gm20854	Blat	Y	10084795	10086876	-1	2081	93.80%	93.80%
Paralogues	Ssty2	ENSMUSG00000095242	Gm20834	Region ComparisonAlignment (protein)Alignment (cDNA)	Y	10322618	10324589	-1	1971	87.22%	87.22%	blat seed
Blat	Ssty2		retro-M38247.1-129	Blat	Y	10930460	10932429	1	1969	95.90%	95.90%
Paralogues	Ssty2	ENSMUSG00000094838	Gm20828	Region ComparisonAlignment (protein)Alignment (cDNA)	Y	11197024	11199374	-1	2350	90.79%	91.19%	blat seed
Blat	Ssty2		Retro-Gm20854	Blat	Y	11464326	11466694	1	2368	96.70%	96.70%
Blat	Ssty2		Retro-Gm20854	Blat	Y	12019055	12021397	1	2342	95.70%	95.70%
Blat	Ssty2		Retro-Gm20854	Blat	Y	12174855	12177781	1	2926	95.70%	95.70%
Paralogues	Ssty2	ENSMUSG00000095508	Gm20812	Region ComparisonAlignment (protein)Alignment (cDNA)	Y	12381981	12384008	1	2027	87.67%	87.67%	blat seed
Blat	Ssty2		Retro-Gm20854	Blat	Y	12417455	12419815	1	2360	96.50%	96.50%
Blat	Ssty2		Retro-Gm20854	Blat	Y	12562577	12564922	-1	2345	92.10%	92.10%
Blat	Ssty2		Retro-Gm20854	Blat	Y	12882071	12884421	-1	2350	91.80%	91.80%
Blat	Ssty2		Retro-Gm20854	Blat	Y	14958203	14960568	1	2365	95.80%	95.80%
Blat	Ssty2		retro-M38247.1-156	Blat	Y	15614984	15616953	1	1969	95.90%	95.90%
Paralogues	Ssty2	ENSMUSG00000095172	Gm20822	Region ComparisonAlignment (protein)Alignment (cDNA)	Y	15882421	15884771	-1	2350	90.79%	91.19%	blat seed
Blat	Ssty2		Retro-Gm20854	Blat	Y	16149691	16152059	1	2368	96.70%	96.70%
Blat	Ssty2		Retro-Gm20854	Blat	Y	16613440	16616364	1	2924	95.70%	95.70%
Blat	Ssty2		Retro-Gm20854	Blat	Y	16731021	16733363	1	2342	95.70%	95.70%
Blat	Ssty2		Retro-Gm20854	Blat	Y	16886785	16889714	1	2929	95.70%	95.70%
Paralogues	Ssty2	ENSMUSG00000095520	Gm20877	Region ComparisonAlignment (protein)Alignment (cDNA)	Y	17093873	17095892	1	2019	87.67%	87.67%	blat seed
Blat	Ssty2		Retro-Gm20854	Blat	Y	17129358	17131718	1	2360	96.50%	96.50%
Blat	Ssty2		Retro-Gm20854	Blat	Y	17274465	17276810	-1	2345	92.10%	92.10%
Blat	Ssty2		Retro-Gm20854	Blat	Y	17595298	17597648	-1	2350	92.10%	92.10%
Blat	Ssty2		Retro-Gm20854	Blat	Y	19670805	19673170	1	2365	95.80%	95.80%
Paralogues	Ssty2	ENSMUSG00000094294	Gm20909	Region ComparisonAlignment (protein)Alignment (cDNA)	Y	21164570	21166905	1	2335	97.36%	97.36%	blat seed
Paralogues	Ssty2	ENSMUSG00000093848	Gm20865	Region ComparisonAlignment (protein)Alignment (cDNA)	Y	21241575	21243910	1	2335	95.15%	95.15%	blat seed
Blat	Ssty2		Retro-Gm20854	Blat	Y	21684737	21687014	-1	2277	96.30%	96.30%
Blat	Ssty2		Retro-Gm20854	Blat	Y	21770060	21772388	1	2328	94.20%	94.20%
Blat	Ssty2		Gm21242	Blat	Y	22512296	22514684	-1	2388	98.80%	98.80%
Blat	Ssty2		Retro-Gm20854	Blat	Y	22586894	22589169	-1	2275	96.00%	96.00%
Blat	Ssty2		Gm21469	Blat	Y	23029677	23032058	-1	2381	98.60%	98.60%
Blat	Ssty2		Retro-Gm20854	Blat	Y	23096347	23098624	-1	2277	95.60%	95.60%
Blat	Ssty2		Retro-Gm20854	Blat	Y	23305200	23307589	-1	2389	98.60%	98.60%
Blat	Ssty2		Retro-Gm20854	Blat	Y	23379985	23382263	-1	2278	96.00%	96.00%
Blat	Ssty2		Retro-Gm20854	Blat	Y	23867004	23869386	-1	2382	98.10%	98.10%
Blat	Ssty2		Retro-Gm20854; Gm20809	Blat	Y	23941818	23944159	-1	2341	98.90%	98.90%
Blat	Ssty2		Retro-Gm20854	Blat	Y	24380262	24382640	-1	2378	98.20%	98.20%
Paralogues	Ssty2	ENSMUSG00000093868	Gm20809	Region ComparisonAlignment (protein)Alignment (cDNA)	Y	24455057	24457399	1	2342	96.04%	96.04%	blat seed
Blat	Ssty2		Retro-Gm20854	Blat	Y	24893371	24895748	-1	2377	98.20%	98.20%
Blat	Ssty2		Retro-Gm20854; Gm20809	Blat	Y	24968035	24970423	1	2388	95.60%	95.60%
Blat	Ssty2		Retro-Gm20854	Blat	Y	25406506	25408884	-1	2378	98.20%	98.20%
Blat	Ssty2		Retro-Gm20854; Gm20809	Blat	Y	25481130	25483518	1	2388	95.50%	95.50%
Blat	Ssty2		Retro-Gm20854	Blat	Y	25919635	25921963	-1	2328	98.60%	98.60%
Blat	Ssty2		Retro-Gm20854; Gm20809	Blat	Y	25994250	25996638	1	2388	95.60%	95.60%
Blat	Ssty2		Retro-Gm20854	Blat	Y	26432712	26435035	-1	2323	96.60%	96.60%
Blat	Ssty2		Retro-Gm20854	Blat	Y	26507311	26509641	-1	2330	97.20%	97.20%
Blat	Ssty2		Retro-Gm20854	Blat	Y	26946037	26948303	-1	2266	96.00%	96.00%
Blat	Ssty2		Retro-Gm20854	Blat	Y	27177782	27180105	-1	2323	96.60%	96.60%
Blat	Ssty2		Retro-Gm20854	Blat	Y	27252403	27254677	-1	2274	95.80%	95.80%
Blat	Ssty2		Retro-Gm20854	Blat	Y	27691121	27693387	-1	2266	96.10%	96.10%
Blat	Ssty2		Retro-Gm20854	Blat	Y	27922762	27925142	-1	2380	98.40%	98.40%
Blat	Ssty2		Retro-Gm20854	Blat	Y	27997328	27999601	-1	2273	95.90%	95.90%
Blat	Ssty2		Retro-Gm20854	Blat	Y	28442238	28444564	-1	2326	98.60%	98.60%
Blat	Ssty2		Retro-Gm20854	Blat	Y	28516767	28519042	-1	2275	95.80%	95.80%
Blat	Ssty2		Retro-Gm20854	Blat	Y	28731934	28734321	-1	2387	98.70%	98.70%
Blat	Ssty2		Gm29317; Ssty1; retro-Gm20854	Blat	Y	30097072	30099079	1	2007	96.00%	96.00%
Blat	Ssty2		Gm29317; Ssty1	Blat	Y	30360648	30362997	-1	2349	94.30%	94.30%
Blat	Ssty2		Gm28459; Ssty1	Blat	Y	31231285	31233922	1	2637	95.80%	95.80%
Blat	Ssty2		Gm28459; Ssty1	Blat	Y	32124275	32126632	1	2357	96.20%	96.20%
Blat	Ssty2		Gm28459; Ssty1	Blat	Y	33104509	33106843	1	2334	96.20%	96.20%
Blat	Ssty2		Gm28459; Ssty1	Blat	Y	34027493	34030127	1	2634	95.80%	95.80%
Blat	Ssty2		Retro-Gm20854	Blat	Y	34485274	34487659	-1	2385	98.50%	98.50%
Blat	Ssty2		Retro-Gm20854	Blat	Y	34560214	34562494	-1	2280	96.00%	96.00%
Blat	Ssty2		Retro-Gm20854	Blat	Y	34779573	34781950	-1	2377	98.50%	98.50%
Blat	Ssty2		Retro-Gm20854	Blat	Y	34854225	34856613	-1	2388	96.30%	96.30%
Blat	Ssty2		Retro-Gm20854	Blat	Y	35299692	35302077	-1	2385	98.50%	98.50%
Blat	Ssty2		Retro-Gm20854	Blat	Y	35348833	35351164	-1	2331	98.70%	98.70%
Blat	Ssty2		Retro-Gm20854	Blat	Y	35567919	35570305	-1	2386	98.50%	98.50%
Blat	Ssty2		Retro-Gm20854; Gm20867	Blat	Y	35642601	35644995	-1	2394	96.30%	96.30%
Blat	Ssty2		Retro-Gm20854	Blat	Y	36090030	36092415	-1	2385	98.10%	98.10%
Blat	Ssty2		Retro-Gm20854	Blat	Y	36163930	36166325	-1	2395	96.50%	96.50%
Blat	Ssty2		Retro-Gm20854	Blat	Y	36903805	36906073	-1	2268	96.10%	96.10%
Blat	Ssty2		Retro-Gm20854	Blat	Y	37099100	37101368	-1	2268	96.10%	96.10%
Blat	Ssty2		Retro-Gm20854	Blat	Y	37428972	37431239	-1	2267	96.10%	96.10%
Blat	Ssty2		Retro-Gm20854	Blat	Y	37883120	37885453	-1	2333	96.00%	96.00%
Paralogues	Ssty2	ENSMUSG00000094575	Gm20738	Region ComparisonAlignment (protein)Alignment (cDNA)	Y	37957811	37960145	1	2334	94.71%	94.71%	blat seed
Blat	Ssty2		Retro-Gm20854	Blat	Y	38171452	38173838	-1	2386	98.60%	98.60%
Blat	Ssty2		Retro-Gm20854	Blat	Y	38246185	38248565	1	2380	95.80%	95.80%
Blat	Ssty2		Retro-Gm20854	Blat	Y	38671815	38674093	-1	2278	96.30%	96.30%
Blat	Ssty2		Retro-Gm20854	Blat	Y	38746085	38748471	-1	2386	96.10%	96.10%
Blat	Ssty2		Retro-Gm20854	Blat	Y	39076805	39079208	1	2403	96.10%	96.10%
Blat	Ssty2		Retro-Gm20854; Gm28371; Ssty1ps	Blat	Y	39988157	39990420	-1	2263	94.40%	94.40%
Blat	Ssty2		Retro-Gm20854; Gm29317; Ssty1	Blat	Y	42079608	42081951	-1	2343	96.20%	96.20%
Blat	Ssty2		Retro-Gm20854	Blat	Y	42223873	42226805	1	2932	95.70%	95.70%
Blat	Ssty2		Retro-Gm20854; Gm28459; Ssty1	Blat	Y	42735223	42737573	-1	2350	94.30%	94.30%
Blat	Ssty2		Retro-Gm20854	Blat	Y	43369775	43372144	-1	2369	96.10%	96.10%
Blat	Ssty2		Retro-Gm20854; Gm21810; Ssty1	Blat	Y	43514132	43516541	1	2409	97.40%	97.40%
Blat	Ssty2		Retro-Gm20854; Gm21783; Ssty1	Blat	Y	44980439	44982853	1	2414	96.20%	96.20%
Blat	Ssty2		Retro-Gm20854; Gm21783; Ssty1	Blat	Y	45385507	45387920	1	2413	96.20%	96.20%
Blat	Ssty2		Retro-Gm20854; Gm28459; Ssty1	Blat	Y	45753169	45755421	-1	2252	94.30%	94.30%
Blat	Ssty2		Retro-Gm20854	Blat	Y	46755837	46758224	-1	2387	98.60%	98.60%
Blat	Ssty2		Retro-Gm20854; Gm28459; Ssty1	Blat	Y	46968754	46971100	-1	2346	96.00%	96.00%
Blat	Ssty2		Retro-Gm20854; Gm29317; Ssty1	Blat	Y	47890654	47893047	1	2393	97.40%	97.40%
Blat	Ssty2		Retro-Gm20854	Blat	Y	48594091	48596166	1	2075	97.50%	97.50%
Blat	Ssty2		Retro-Gm20854	Blat	Y	48669634	48671974	1	2340	98.80%	98.80%
Blat	Ssty2		Retro-Gm20854; Gm21308; Ssty1	Blat	Y	49317369	49319441	1	2072	97.40%	97.40%
Blat	Ssty2		Retro-Gm20854; Gm20924; Ssty1	Blat	Y	49842226	49844296	1	2070	97.40%	97.40%
Blat	Ssty2		Retro-Gm20854	Blat	Y	49917386	49919722	1	2336	98.80%	98.80%
Blat	Ssty2		Retro-Gm20854	Blat	Y	50359771	50361845	1	2074	96.50%	96.50%
Blat	Ssty2		Retro-Gm20854; Gm20868	Blat	Y	50435035	50437373	1	2338	98.80%	98.80%
Blat	Ssty2		Retro-Gm20854; Gm21308; Ssty1	Blat	Y	50879475	50881546	1	2071	97.20%	97.20%
Blat	Ssty2		Retro-Gm20854	Blat	Y	50954707	50956715	-1	2008	94.40%	94.40%
Blat	Ssty2		Retro-Gm20854	Blat	Y	51390461	51392531	1	2070	97.40%	97.40%
Blat	Ssty2		Retro-Gm20854	Blat	Y	51605107	51607437	1	2330	97.30%	97.30%
Blat	Ssty2		Retro-Gm20854; Gm20868	Blat	Y	51680399	51682737	1	2338	98.70%	98.70%
Blat	Ssty2		Retro-Gm20854	Blat	Y	52261802	52264061	-1	2259	94.20%	94.20%
Blat	Ssty2		Retro-Gm20854; Gm20924; Ssty1	Blat	Y	52606938	52609011	1	2073	97.30%	97.30%
Blat	Ssty2		Retro-Gm20854	Blat	Y	53050103	53052179	1	2076	97.30%	97.30%
Blat	Ssty2		Retro-Gm20854	Blat	Y	53124815	53126899	1	2084	96.80%	96.80%
Blat	Ssty2		Retro-Gm20854; Gm20865; Ssty2ps	Blat	Y	53340869	53342944	1	2075	97.40%	97.40%
Paralogues	Ssty2	ENSMUSG00000094729	Gm20747	Region ComparisonAlignment (protein)Alignment (cDNA)	Y	53415953	53418291	-1	2338	97.36%	97.36%	blat seed
Blat	Ssty2		Retro-Gm20854	Blat	Y	53637441	53639511	1	2070	97.20%	97.20%
Blat	Ssty2		Retro-Gm20854	Blat	Y	53712595	53714600	-1	2005	94.60%	94.60%
Blat	Ssty2		retro-M38247.1-464	Blat	Y	54110983	54113056	1	2073	97.40%	97.40%
Blat	Ssty2		Gm21302; Ssty1	Blat	Y	54185846	54188183	1	2337	98.90%	98.90%
Blat	Ssty2		Retro-Gm20854	Blat	Y	54414134	54416206	1	2072	97.40%	97.40%
Blat	Ssty2		Retro-Gm20854	Blat	Y	54488987	54491246	-1	2259	94.40%	94.40%
Blat	Ssty2		Retro-Gm20854	Blat	Y	54968053	54970113	1	2060	97.50%	97.50%
Blat	Ssty2		Retro-Gm20854	Blat	Y	55482602	55484676	1	2074	97.40%	97.40%
Blat	Ssty2		Gm21330; Ssty1	Blat	Y	55557516	55559844	-1	2328	94.20%	94.20%
Blat	Ssty2		Gm21330; Ssty1	Blat	Y	55943241	55945316	1	2075	97.40%	97.40%
Blat	Ssty2		Gm20852	Blat	Y	56018093	56020101	-1	2008	94.60%	94.60%
Blat	Ssty2		Retro-Gm20854	Blat	Y	56248769	56251088	1	2319	97.30%	97.30%
Blat	Ssty2		Retro-Gm20854	Blat	Y	56323496	56325756	-1	2260	94.40%	94.40%
Blat	Ssty2		Retro-Gm20854	Blat	Y	57016129	57019054	1	2925	96.40%	96.40%
Blat	Ssty2		Retro-Gm20854	Blat	Y	57456585	57458905	1	2320	97.40%	97.40%
Paralogues	Ssty2	ENSMUSG00000096122	Gm21943	Region ComparisonAlignment (protein)Alignment (cDNA)	Y	57531412	57533744	-1	2332	97.36%	97.36%	blat seed
Blat	Ssty2		Gm28459; Ssty1	Blat	Y	58368705	58370959	1	2254	95.70%	95.70%
Blat	Ssty2		Gm28459; Ssty1	Blat	Y	59830188	59832581	1	2393	97.40%	97.40%
Blat	Ssty2		Gm29317; Ssty1	Blat	Y	60681034	60683427	1	2393	97.40%	97.40%
Blat	Ssty2		Retro-Gm20854	Blat	Y	61384477	61386551	1	2074	97.50%	97.50%
Blat	Ssty2		Retro-Gm20854	Blat	Y	61459890	61462230	1	2340	98.80%	98.80%
Blat	Ssty2		Gm21308; Ssty1	Blat	Y	61945049	61947121	1	2072	97.40%	97.40%
Blat	Ssty2		Retro-Gm20854	Blat	Y	62020255	62022589	1	2334	98.90%	98.90%
Paralogues	Ssty2	ENSMUSG00000093950	Gm20823	Region ComparisonAlignment (protein)Alignment (cDNA)	Y	62462504	62464845	-1	2341	94.71%	94.71%	blat seed
Blat	Ssty2		Retro-Gm20854	Blat	Y	62537108	62539444	1	2336	98.80%	98.80%
Blat	Ssty2		Retro-Gm20854	Blat	Y	62980406	62982678	1	2272	95.80%	95.80%
Blat	Ssty2		Gm20868; retro-Gm20854	Blat	Y	63055047	63057055	-1	2008	94.70%	94.70%
Blat	Ssty2		Gm21308; Ssty1	Blat	Y	63500214	63502286	1	2072	97.20%	97.20%
Blat	Ssty2		Retro-Gm20854	Blat	Y	64011736	64013806	1	2070	97.40%	97.40%
Blat	Ssty2		Retro-Gm20854	Blat	Y	64226371	64228697	1	2326	97.30%	97.30%
Blat	Ssty2		Gm20823; retro-Gm20854	Blat	Y	64301774	64304112	1	2338	98.70%	98.70%
Blat	Ssty2		Retro-Gm20854; Gm20823	Blat	Y	64784039	64786299	1	2260	98.60%	98.60%
Blat	Ssty2		Retro-Gm20854	Blat	Y	64858529	64860868	1	2339	98.90%	98.90%
Paralogues	Ssty2	ENSMUSG00000095785	Gm20924	Region ComparisonAlignment (protein)Alignment (cDNA)	Y	65205185	65207527	-1	2342	94.71%	94.71%	blat seed
Blat	Ssty2		Retro-Gm20854	Blat	Y	65647801	65649874	1	2073	97.30%	97.30%
Blat	Ssty2		Retro-Gm20854	Blat	Y	65722528	65724609	1	2081	96.80%	96.80%
Blat	Ssty2		Retro-Gm20854; Gm20865; Ssty2ps	Blat	Y	65938577	65940654	1	2077	97.50%	97.50%
Blat	Ssty2		Retro-Gm20854	Blat	Y	66405823	66408096	-1	2273	96.50%	96.50%
Blat	Ssty2		retro-M28247.1-587	Blat	Y	66665111	66667186	1	2075	97.40%	97.40%
Paralogues	Ssty2	ENSMUSG00000096666	Gm20852	Region ComparisonAlignment (protein)Alignment (cDNA)	Y	66739787	66742123	-1	2336	98.24%	98.24%	blat seed
Blat	Ssty2		Retro-Gm20854	Blat	Y	66970434	66972506	1	2072	97.40%	97.40%
Parent	Ssty2		Ssty2	Region ComparisonAlignment (protein)Alignment (cDNA)	Y	67045743	67048072	-1	2329	100.00%	100.00%	blat seed
Blat	Ssty2		Retro-Gm20854	Blat	Y	67263799	67266121	1	2322	97.30%	97.30%
Blat	Ssty2		Retro-Gm20854; Gm20806	Blat	Y	67339048	67341436	1	2388	98.60%	98.60%
Blat	Ssty2		Retro-Gm20854	Blat	Y	67947281	67949665	-1	2384	98.70%	98.70%
Blat	Ssty2		Retro-Gm20854	Blat	Y	68022024	68024360	-1	2336	99.30%	99.30%
Blat	Ssty2		Retro-Gm20854	Blat	Y	68463306	68465692	-1	2386	98.50%	98.50%
Paralogues	Ssty2	ENSMUSG00000095634	Gm20816	Region ComparisonAlignment (protein)Alignment (cDNA)	Y	68537955	68540290	1	2335	95.59%	95.59%	blat seed
Blat	Ssty2		Retro-Gm20854	Blat	Y	69016263	69018648	-1	2385	98.50%	98.50%
Blat	Ssty2		Retro-Gm20854	Blat	Y	69091235	69093630	-1	2395	96.40%	96.40%
Blat	Ssty2		Gm21242; retro-Gm20854	Blat	Y	69351049	69353433	-1	2384	98.60%	98.60%
Blat	Ssty2		Retro-Gm20854	Blat	Y	69625133	69627212	1	2079	97.60%	97.60%
Blat	Ssty2		retro-M38247.1-634	Blat	Y	69907566	69909641	1	2075	97.30%	97.30%
Blat	Ssty2		Retro-Gm20854	Blat	Y	69982735	69985073	1	2338	98.90%	98.90%
Blat	Ssty2		Gm21308; Ssty1	Blat	Y	70196149	70198221	1	2072	97.40%	97.40%
Paralogues	Ssty2	ENSMUSG00000094052	Gm21118	Region ComparisonAlignment (protein)Alignment (cDNA)	Y	70271306	70273642	-1	2336	97.36%	97.36%	blat seed
Blat	Ssty2		Gm21316; Ssty1	Blat	Y	70705445	70707516	1	2071	97.30%	97.30%
Blat	Ssty2		Retro-Gm20854	Blat	Y	70780578	70782915	1	2337	96.10%	96.10%
Blat	Ssty2		Retro-Gm20854	Blat	Y	71222621	71224937	1	2316	96.30%	96.30%
Blat	Ssty2		Retro-Gm20854; Gm20868	Blat	Y	71297825	71300163	1	2338	98.80%	98.80%
Blat	Ssty2		Retro-Gm20854	Blat	Y	71964316	71966576	1	2260	98.60%	98.60%
Blat	Ssty2		Retro-Gm20854	Blat	Y	72038868	72041131	-1	2263	94.30%	94.30%
Blat	Ssty2		Retro-Gm20854; Gm20823	Blat	Y	72381878	72383951	1	2073	97.40%	97.40%
Blat	Ssty2		Retro-Gm20854; Gm20809	Blat	Y	72818945	72821022	1	2077	97.50%	97.50%
Blat	Ssty2		Retro-Gm20854	Blat	Y	72893813	72895891	1	2078	96.90%	96.90%
Blat	Ssty2		Retro-Gm20854	Blat	Y	72967886	72970223	1	2337	98.20%	98.20%
Blat	Ssty2		Retro-Gm20854; Gm20865	Blat	Y	73239081	73241423	1	2342	99.10%	99.10%
Blat	Ssty2		Retro-Gm20854; Gm20909	Blat	Y	73313688	73315696	-1	2008	94.60%	94.60%
Blat	Ssty2		Retro-Gm20854; Gm21330	Blat	Y	73535403	73537732	-1	2329	94.20%	94.20%
Blat	Ssty2		retro-M38247.1-693	Blat	Y	73936112	73938186	1	2074	97.30%	97.30%
Blat	Ssty2		Retro-Gm20854	Blat	Y	74011336	74013674	1	2338	98.90%	98.90%
Blat	Ssty2		retro-M38247.1-698	Blat	Y	74225155	74227229	1	2074	97.50%	97.50%
Blat	Ssty2		Retro-Gm20854	Blat	Y	74300071	74302081	-1	2010	94.60%	94.60%
Blat	Ssty2		Retro-Gm20854	Blat	Y	74788262	74790345	1	2083	97.70%	97.70%
Blat	Ssty2		Retro-Gm20854	Blat	Y	75025252	75027592	1	2340	99.10%	99.10%
Blat	Ssty2		Retro-Gm20854	Blat	Y	75464988	75467067	1	2079	97.40%	97.40%
Blat	Ssty2		Retro-Gm20854	Blat	Y	75539574	75541911	1	2337	98.80%	98.80%
Blat	Ssty2		Retro-Gm20854	Blat	Y	75986039	75988111	1	2072	97.30%	97.30%
Blat	Ssty2		Retro-Gm20854	Blat	Y	76060825	76063158	1	2333	99.70%	99.70%
Blat	Ssty2		Retro-Gm20854	Blat	Y	76500082	76502162	1	2080	97.70%	97.70%
Blat	Ssty2		Retro-Gm20854	Blat	Y	76575586	76577924	1	2338	98.80%	98.80%
Blat	Ssty2		Retro-Gm20854; Gm21308; Ssty1	Blat	Y	77073343	77075665	1	2322	97.30%	97.30%
Blat	Ssty2		Retro-Gm20854	Blat	Y	77148598	77150671	1	2073	98.90%	98.90%
Paralogues	Ssty2	ENSMUSG00000096898	Gm20867	Region ComparisonAlignment (protein)Alignment (cDNA)	Y	77960873	77963204	-1	2331	95.59%	95.59%	blat seed
Blat	Ssty2		Retro-Gm20854	Blat	Y	78034889	78036901	-1	2012	94.40%	94.40%
Blat	Ssty2		Retro-Gm20854	Blat	Y	78470570	78472641	1	2071	97.40%	97.40%
Blat	Ssty2		Retro-Gm20854	Blat	Y	78761214	78763219	-1	2005	95.00%	95.00%
Paralogues	Ssty2	ENSMUSG00000094739	Gm20806	Region ComparisonAlignment (protein)Alignment (cDNA)	Y	78835721	78838056	-1	2335	97.80%	97.80%	blat seed
Blat	Ssty2		Retro-Gm20854	Blat	Y	79074118	79076459	1	2341	95.90%	95.90%
Paralogues	Ssty2	ENSMUSG00000095867	Gm20917	Region ComparisonAlignment (protein)Alignment (cDNA)	Y	79148789	79151122	-1	2333	97.36%	97.36%	blat seed
Blat	Ssty2		Retro-Gm20854	Blat	Y	79589578	79591651	1	2073	97.40%	97.40%
Blat	Ssty2		Retro-Gm20854; Ssty2	Blat	Y	79664747	79667087	1	2340	96.40%	96.40%
Blat	Ssty2		Retro-Gm20854	Blat	Y	79882911	79884981	1	2070	97.40%	97.40%
Blat	Ssty2		Retro-Gm20854; Gm20806	Blat	Y	79958258	79960645	1	2387	98.60%	98.60%
Blat	Ssty2		Retro-Gm20854	Blat	Y	80387881	80389951	1	2070	97.40%	97.40%
Blat	Ssty2		Retro-Gm20854; Ssty2	Blat	Y	80463105	80465442	1	2337	98.80%	98.80%
Blat	Ssty2		Retro-Gm20854	Blat	Y	80681118	80683191	1	2073	97.60%	97.60%
Blat	Ssty2		Retro-Gm20854	Blat	Y	80756210	80758221	-1	2011	94.40%	94.40%
Blat	Ssty2		Retro-Gm20854	Blat	Y	81203109	81205187	1	2078	97.50%	97.50%
Blat	Ssty2		Retro-Gm20854	Blat	Y	81284852	81287192	1	2340	98.10%	98.10%
Blat	Ssty2		Retro-Gm20854	Blat	Y	81724480	81726816	1	2336	95.90%	95.90%
Blat	Ssty2		Retro-Gm20854; Gm20909	Blat	Y	81799143	81801150	-1	2007	94.60%	94.60%
Blat	Ssty2		Retro-Gm20854	Blat	Y	82019098	82021438	1	2340	99.20%	99.20%
Blat	Ssty2		Retro-Gm20854	Blat	Y	82093683	82095694	1	2011	96.60%	96.60%
Blat	Ssty2		Retro-Gm20854	Blat	Y	82492832	82495170	1	2338	98.90%	98.90%
Blat	Ssty2		Retro-Gm20854	Blat	Y	82567381	82569391	-1	2010	94.50%	94.50%
Blat	Ssty2		Retro-Gm20854	Blat	Y	82786357	82788431	1	2074	97.40%	97.40%
Blat	Ssty2		Retro-Gm20854	Blat	Y	82861204	82863216	-1	2012	94.40%	94.40%
Blat	Ssty2		Retro-Gm20854	Blat	Y	83287762	83290089	-1	2327	97.60%	97.60%
Blat	Ssty2		Retro-Gm20854	Blat	Y	83361558	83363616	1	2058	98.70%	98.70%
Blat	Ssty2		retro-M38247.1-827	Blat	Y	83714398	83716480	1	2082	97.40%	97.40%
Blat	Ssty2		retro-M38247.1-829; Gm20854	Blat	Y	83852238	83854581	-1	2343	96.50%	96.50%
Blat	Ssty2		retro-M38247.1-830; Gm20854	Blat	Y	83926916	83928941	-1	2025	96.40%	96.40%
Blat	Ssty2		Retro-Gm20854	Blat	Y	84365428	84367769	1	2341	95.90%	95.90%
Blat	Ssty2		Retro-Gm20854; Gm21394	Blat	Y	84440140	84442478	1	2338	99.30%	99.30%
Blat	Ssty2		Retro-Gm20854	Blat	Y	84488958	84491301	1	2343	95.90%	95.90%
Paralogues	Ssty2	ENSMUSG00000094660	Gm21394	Region ComparisonAlignment (protein)Alignment (cDNA)	Y	84562572	84564907	-1	2335	97.80%	97.80%	blat seed
Blat	Ssty2		Retro-Gm20854	Blat	Y	85086525	85088717	1	2192	99.00%	99.00%
Blat	Ssty2		Retro-Gm20854	Blat	Y	85167972	85170299	-1	2327	94.40%	94.40%
Blat	Ssty2		Retro-Gm20854	Blat	Y	85453132	85455212	1	2080	97.30%	97.30%
Paralogues	Ssty2	ENSMUSG00000095650	Gm20854	Region ComparisonAlignment (protein)Alignment (cDNA)	Y	85528517	85530908	-1	2391	97.36%	97.36%	blat seed
Blat	Ssty2		Retro-Gm20854	Blat	Y	85813525	85815602	1	2077	97.30%	97.30%
Blat	Ssty2		Retro-Gm20854	Blat	Y	85888821	85890876	1	2055	99.20%	99.20%
Blat	Ssty2		Retro-Gm20854	Blat	Y	86365037	86367117	1	2080	97.50%	97.50%
Blat	Ssty2		Retro-Gm20854	Blat	Y	86434069	86436086	-1	2017	94.80%	94.80%
Blat	Ssty2		Retro-Gm20854	Blat	Y	86868671	86871005	1	2334	97.30%	97.30%
Blat	Ssty2		Retro-Gm20854	Blat	Y	86943495	86945571	-1	2076	94.50%	94.50%
Blat	Ssty2		Retro-Gm20854	Blat	Y	87824187	87826510	1	2323	97.30%	97.30%
Blat	Ssty2		Retro-Gm20854	Blat	Y	88401225	88403618	1	2393	98.90%	98.90%
Blat	Ssty2		Retro-Gm20854	Blat	Y	88804069	88806376	1	2307	97.00%	97.00%
Blat	Ssty2		Retro-Gm20854	Blat	Y	88885782	88887791	-1	2009	94.60%	94.60%
Blat	Ssty2		Retro-Gm20854; Gm21838; Ssty1	Blat	Y	89328647	89330993	1	2346	96.30%	96.30%
Blat	Ssty2		retro-M38247.1-902	Blat	Y	89473523	89475606	-1	2083	95.20%	95.20%
Blat	Ssty2		Retro-Gm20854	Blat	Y	89844704	89847049	1	2345	95.90%	95.90%
Blat	Ssty2		Retro-Gm20854; Gm20879	Blat	Y	89998165	90001106	-1	2941	95.80%	95.80%
